# Supplementary material for: Nanoscale Strontium-Substituted Hydroxyapatite Pastes and Gels for Bone Tissue Regeneration
Source: MDPI journal article supplement (doi:10.3390/nano11061611), 2021-06-19
Supplement: s1 [file s1]

Supplementary data

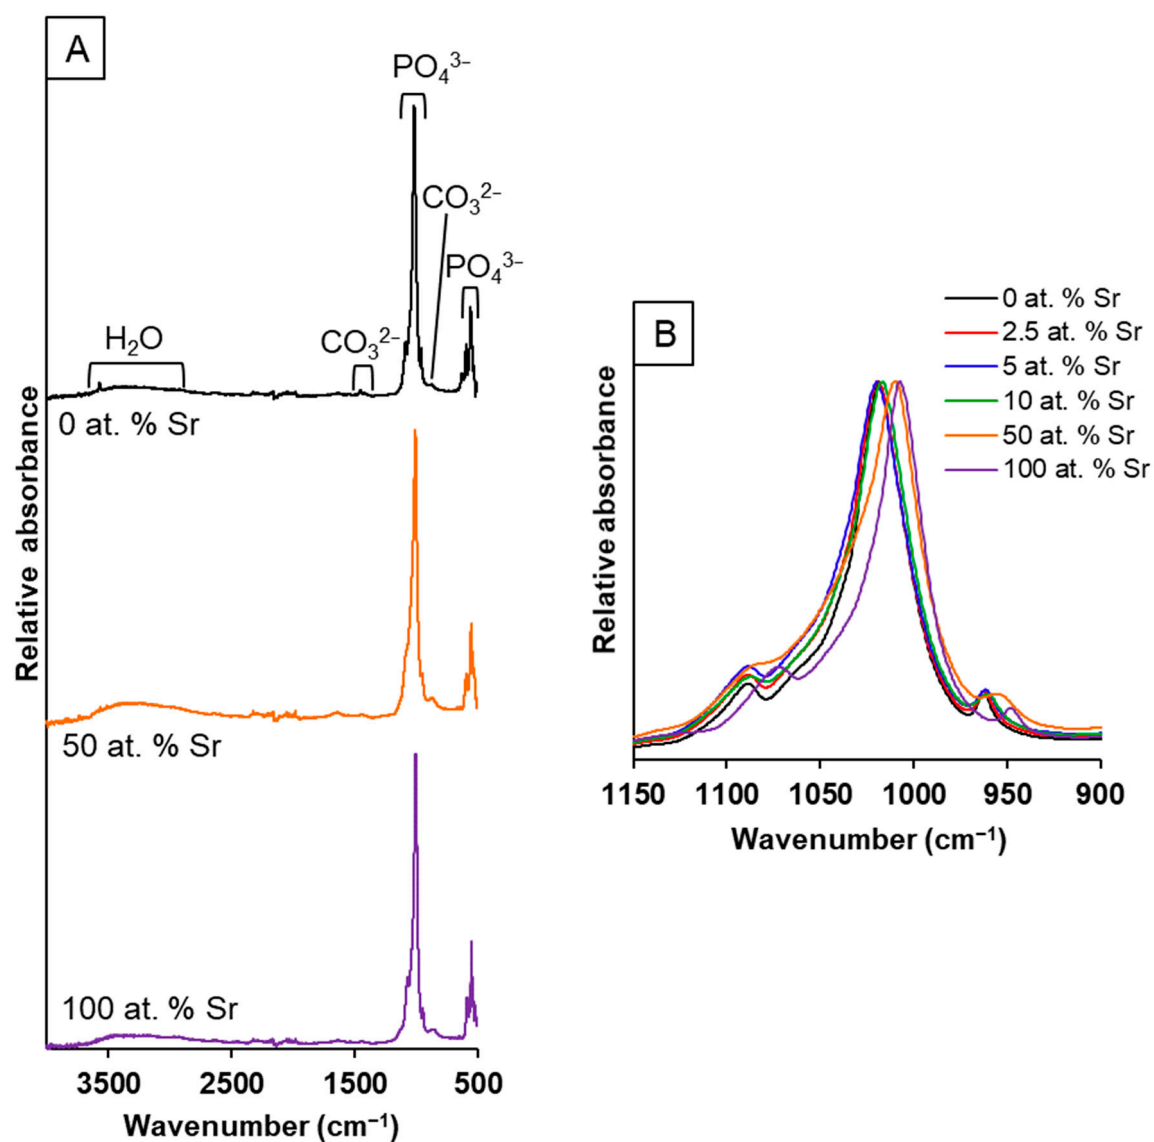

Figure S1. FTIR-ATR spectra of unsintered SrHA powders produced using the sol-gel method: 0, 50 and 100 at.% SrHA (A), and phosphate peaks of 0, 2.5, 5, 10, 50 and 100 at.% SrHA (B).
